# Supplementary material for: An Engineered Escherichia coli Strain with Synthetic Metabolism for in‐Cell Production of Translationally Active Methionine Derivatives
Source: PubMed Central journal article supplement (PMC7756864; doi:10.1002/cbic.202000257), 2020-10-13
Supplement: CBIC-21-3525-s001.pdf [file CBIC-21-3525-s001.pdf]

# ChemBioChem

Supporting Information

## **An Engineered *Escherichia coli* Strain with Synthetic Metabolism for in-Cell Production of Translationally Active Methionine Derivatives**

Christian Johannes Schipp<sup>+</sup>, Ying Ma<sup>+</sup>, Ammar Al-Shameri, Federico D'Alessio, Peter Neubauer, Roberto Contestabile, Nediljko Budisa,\* and Martino Luigi di Salvo\*

## **Author Contributions**

C.S. First author:Equal

Y.M. First author:Equal

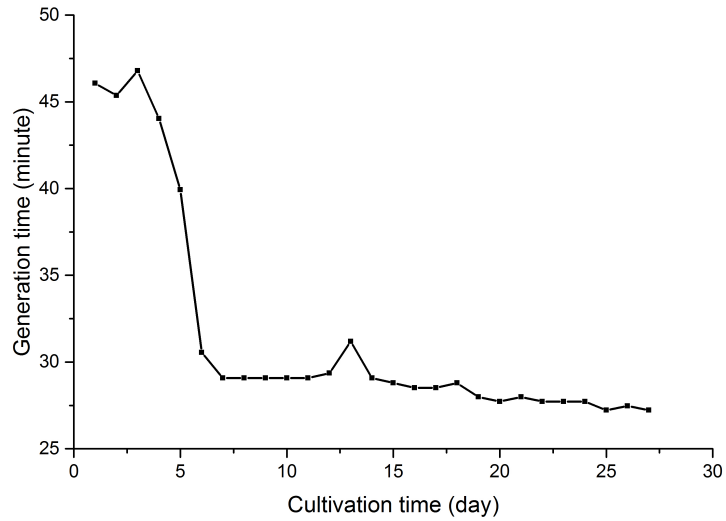

**Figure S1. Direct evolution of *MDS15* strain in the Genemate3 turbidostat system.** The generation time of the *E. coli* strain *MDS15* in the Genemate 3 turbidostat is calculated according to the dilution pulse frequency (see Materials and Methods section). Upon pressure of diluted medium, cells were evolved towards more robust growth and shorter generation time. The sharp peak near to the 13<sup>th</sup> day corresponds to routinary equipment adjustment in the Genemate 3 device. After 27 days of evolution, the generation time of *MDS15* strain was decreased from 46 minutes to 27 minutes.

### Barstar (B\*)

MKKAVINGEQIRSIIDLHQTLLKELALAEYYGENLDALWDALTGWVMYPLVLEWRQFEQSKQLTENGA  
ESVLQVFREAKAEGADITIIIS

### GFP1M *Green fluorescent protein (1 Met residue)*

MRGSHHHHHHGS**ENLYFQ**SASKGEELFTGVVPIVVELDGDVNGHKFSVRGEGEGDATNGKLTLLKFICT  
TGKLPVPWPTLVTTTLGYGVQCFARYPDHIKRHDFFKSALPEGYVQERTISFKDDGTYKTRAEVKFEGD  
TLVNRIELKGIDFKEMGNILGHKLEYNFNSHKVYITADKQKNGIKANFKIRHNVEDGQSVQLADHYQQN  
TPIGDGPVLLPDNHYLSTQSVLLKDPNEKRDHAVLLEFVTAAGITHGKDDELYK

### GFP2M *Green fluorescent protein (2 Met residue)*

MRGSHHHHHHGS**ENLYFQ**SASKGEELFTGVVPIVVELDGDVNGHKFSVRGEGEGDATNGKLTLLKFICM  
TGKLPVPWPTLVTTTLGYGVQCFARYPDHIKRHDFFKSALPEGYVQERTISFKDDGTYKTRAEVKFEGD  
TLVNRIELKGIDFKEMGNILGHKLEYNFNSHKVYITADKQKNGIKANFKIRHNVEDGQSVQLADHYQQN  
TPIGDGPVLLPDNHYLSTQSVLLKDPNEKRDHAVLLEFVTAAGITHGKDDELYK

### ECFP-N *Enhanced cyan fluorescent protein (His<sub>6</sub>-Tag at the N-terminal)*

MRGSHHHHHHGS**MV**SKGEELFTGVVPIVVELDGDVNGHKFSVSGEGEGDATYGKLTLLKFICTTGKLPV  
PWPTLVTTTLTWGVQCFSRYPDH**MKQ**HDFFKS**AM**PEGYVQERTIFFKDDGNYKTRAEVKFEGDTLVNRI  
ELKGIDFKEDGNILGHKLEYNYISHNVYITADKQKNGIKANFKIRHNIEDGQSVQLADHYQQNTPIGDG  
PVLLPDNHYLSTQSA**LSKDPNEKRDH**MV**LLEFVTAAGITLGM**DELYK

### ECFP-C *Enhanced cyan fluorescent protein (His<sub>6</sub>-Tag at the C-terminal)*

**MV**SKGEELFTGVVPIVVELDGDVNGHKFSVSGEGEGDATYGKLTLLKFICTTGKLPVPWPTLVTTTLTWG  
VQCFSRYPDH**MKQ**HDFFKS**AM**PEGYVQERTIFFKDDGNYKTRAEVKFEGDTLVNRIELKGIDFKEDGN  
ILGHKLEYNYISHNVYITADKQKNGIKANFKIRHNIEDGQSVQLADHYQQNTPIGDGPVLLPDNHYLST  
QSA**LSKDPNEKRDH**MV**LLEFVTAAGITLGM**DELYK**HHHHHH**

### GTL *Geobacillus thermocatenulatus lipase*

MRGSHHHHHHGS**RE****ENLYFQ****G**AASRANDAPIVLLHGFTGW**GREEM**FGFKYWGGVVRGDIEQWLNDNGYRT  
YTLAVGPLSSNWDRA**CEAYAQLVGGTV**DYGA**AAHAKHG**HARFGR**TYP**GLLPELKRGGRIHIIAHSQGG  
QTAR**MLV**S**LL**ENG**SQE**E**REYAKAHNV**SL**SPL**FEGGHFVLSVTTIATPHDGTTLVN**M**VDFDRFFDLQ  
KAVLEAAAVASNPYTSQVYDFKLDQWGLRRQPGESFDHYFERLKRSPVWTSTDTARYDLSVSGAEKL  
NQWVQASPN**TY**YLSFATERTYRGAL**TGN**Y**PELGM**NAFSAVVCAPFLGSYRNP**TLG**IDDRWLENDGIV  
NTV**SM**NGPKRGSSDRIVPYDGAL**KKGV**W**NDM**GTYNVDHLEIGVDPNPSFDIRAFYLR**LAEQLASLRP**

**Figure S2. Primary structure of target proteins used in this study.** Met residues are shown in red bold (**M**). His<sub>6</sub>-Tag sequence is highlighted in cyan (**HHHHHH**); Tobacco Etch Virus endopeptidase (TEV) cleavage site is highlighted in green (**EXLYΦQ\φ**), being: x, any amino acid; Φ, large hydrophobic residue; φ, small hydrophobic/polar residue). TEV protease cuts after Q residue.

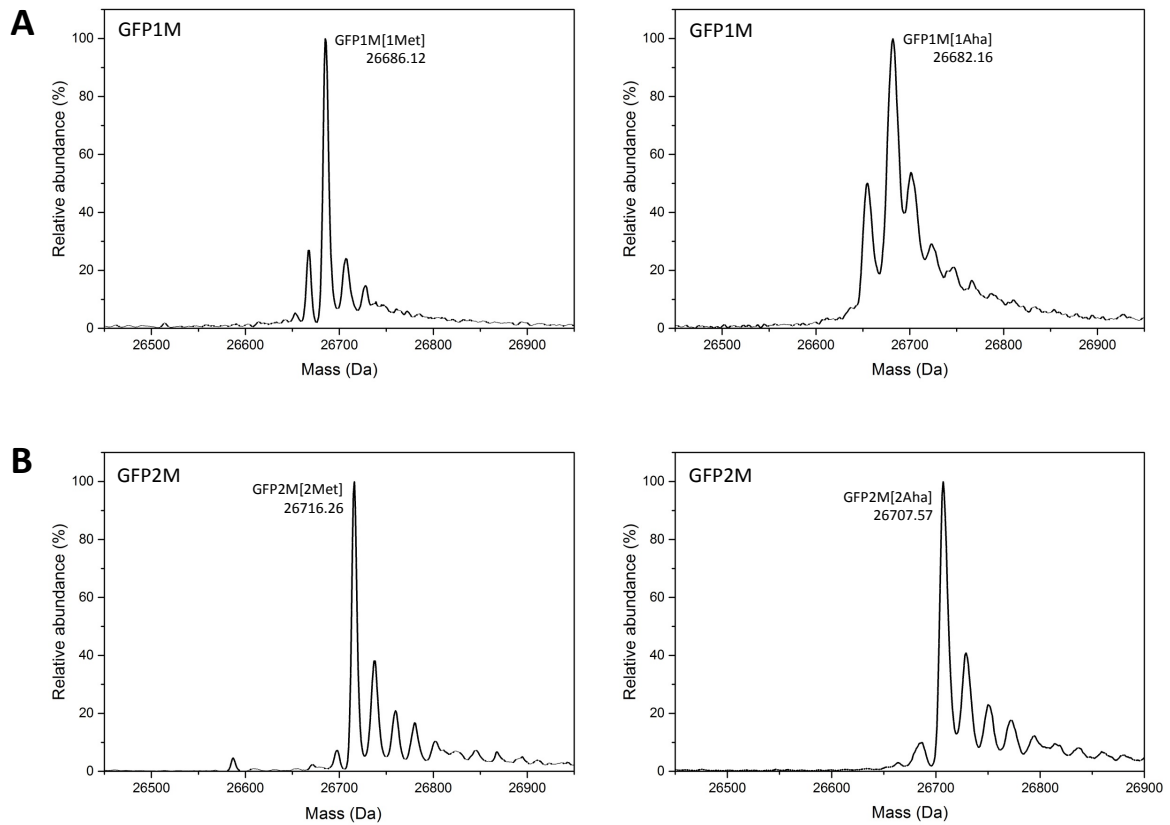

**Figure S3. Mass spectrometry analysis of different variants of GFP. Panel A: GFP1M** expressed in *MDS15A*, in the presence of Met (left) or according to our Aha production/incorporation system (right)(setup number 9 in Table 2); **Panel B: GFP2M** expressed in *MDS15A*, in the presence of Met (left) or according to our Aha production/incorporation system (right)(setup number 10 in Table 2). The substitution of each Met with Aha is expected to decrease the molecular weight of the protein by 5.1 Da. The values of deconvoluted and theoretical calculated masses are shown in Table 3. The additional signals around the main protein peaks represent salt adducts.

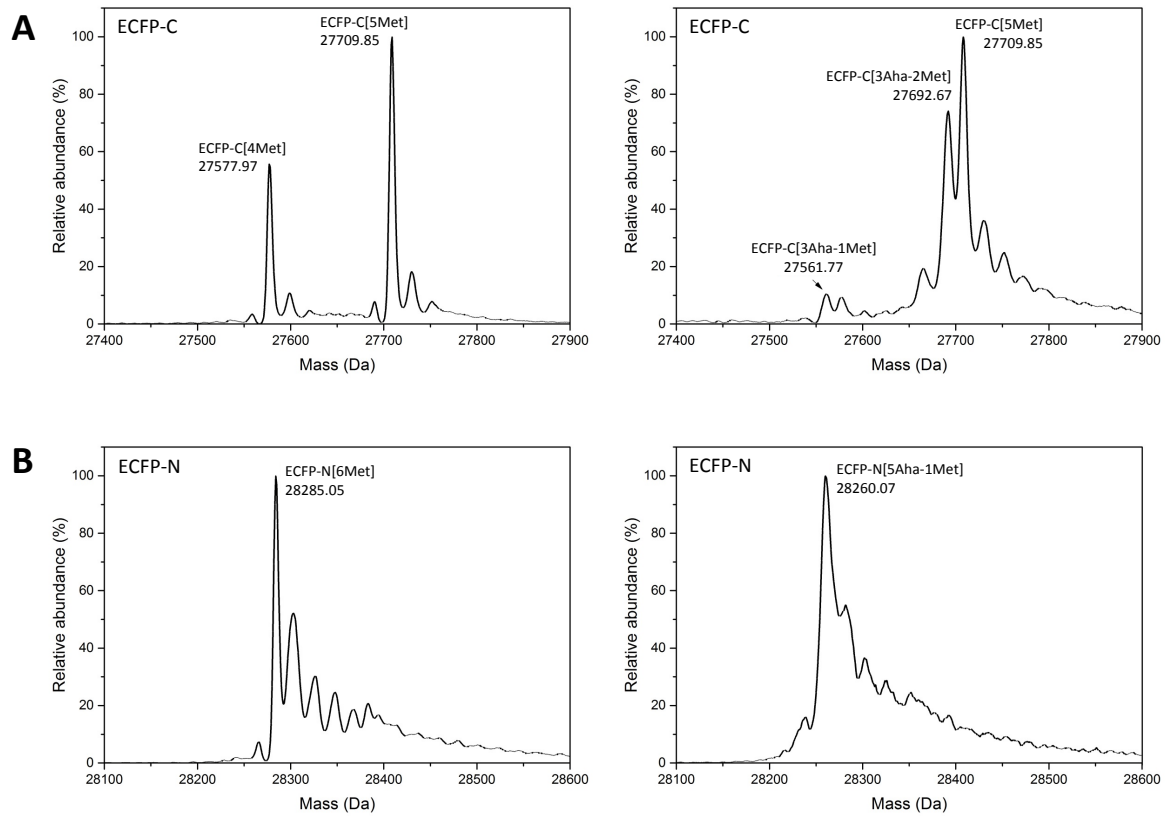

**Figure S4. Mass spectrometry analysis of different variants of ECFP. Panel A: ECFP-C** expressed in *MDS15A*, in the presence of methionine (left) or according to our Aha production/incorporation system (right)(setup number 5 in Table 2); **Panel B: ECFP-N** expressed in *MDS15A*, in the presence of methionine (left) or according to our Aha production/incorporation system (right)(setup number 8 in Table 2). The values of deconvoluted and theoretical calculated masses are shown in Table 3. The additional signals around the main protein peaks represent salt adducts.

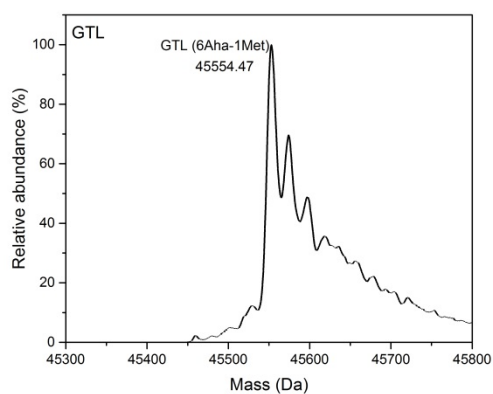

**Figure S5. Mass spectrometry analysis of GTL**, expressed in *MDS15* strain according to our Aha production/incorporation system (setup number 2 in Table 2).

**As shown from the graphs, the deconvoluted mass was:**

GTL[6Aha-1Met]     45554.47 Da

**Theoretical masses calculated from primary structure is:**

GTL[6Aha-1Met]     45554.65 Da

The additional signals around the main protein peak represent salt adducts.

**Table S1. Bacterial strains used in this work** (please, refer to Scheme 1 for metabolites and biosynthetic pathways reported in the **Description** column).

| <b><i>E. coli</i> strain</b> | <b>Genotype</b>                                                                                                                                                                                                  | <b>Description</b>                                                                                                                                                                                                                            | <b>Source</b>             |
|------------------------------|------------------------------------------------------------------------------------------------------------------------------------------------------------------------------------------------------------------|-----------------------------------------------------------------------------------------------------------------------------------------------------------------------------------------------------------------------------------------------|---------------------------|
| JW3973-1                     | <i>F</i> $\Delta$ ( <i>araD-araB</i> )567<br>$\Delta$ <i>lacZ</i> 4787(:: <i>rrnB</i> -3) $\lambda$ - <i>rph</i> -1<br>$\Delta$ ( <i>rhaD-rhaB</i> )568 $\Delta$ <i>metA</i> 780:: <i>kan</i><br><i>hsdR</i> 514 | Knockout strain for <i>metA</i> (encoding endogenous homoserine <i>O</i> -succinyltransferase). Met-auxotroph. It is able to synthesize L-homoserine but not L-homocysteine. It can still synthesize L-methionine if fed with L-homocysteine. | CGSC-Keio collection      |
| B834(DE3)                    | <i>F</i> <i>dcm ompT hsdS</i> ( <i>rB- mB-</i> ) <i>gal met</i> $\lambda$ (DE3 [ <i>lacI lacUV5-T7 gene 1 ind1 sam7 nin5</i> ]) $\Delta$ <i>met E</i>                                                            | Knockout strain for <i>metE</i> (encoding endogenous methionine synthase). Met-auxotroph. This strain is still able to make L-homocysteine from L-homoserine, through the transsulfuration pathway.                                           | Novagen (Merck-Millipore) |
| MDS15<br>MDS15A              | <i>F</i> <i>dcm ompT hsdS</i> ( <i>rB- mB-</i> ) <i>gal met</i> $\lambda$ (DE3 [ <i>lacI lacUV5-T7 gene 1 ind1 sam7 nin5</i> ]) $\Delta$ <i>met E</i><br>$\Delta$ <i>metA</i> 780                                | Double knockout strain, for <i>metA</i> and <i>metE</i> . Met-auxotroph. Not able to synthesize either L-homoserine or L-homocysteine. Not able to synthesize L-methionine even if fed with L-homocysteine.                                   | This work                 |
| BL21-gold (DE3)              | <i>B F- ompT hsdS</i> ( <i>rB- mB-</i> ) <i>dcm+</i><br><i>TetR gal</i> $\lambda$ (DE3) <i>endA Hte</i>                                                                                                          | Strain used to express the enzymes <i>cgHSAT</i> and <i>cgOAHSS</i> for <i>in vitro</i> test reaction                                                                                                                                         | Novagen (Merck-Millipore) |



**Table S2. Primer list of oligonucleotides used in this study.**

| Primer name  | Sequence                                                                          | Note                                                                                                                                 |
|--------------|-----------------------------------------------------------------------------------|--------------------------------------------------------------------------------------------------------------------------------------|
| metA-P1      | 5'-GCTATCTGGATGTCTAAACGTATAAGCGTATGTAGTGAGGT<br>AATCAGGTTGTGTAGGCTGGAGCTGCTTC-3'  | Forward primer for FRT-KanR-FRT cassette amplification for <i>metA</i> knockout                                                      |
| metA-P2      | 5'-GTGCCTGAGGTAAGGTGCTGAATCGCTTAACGATCGACTAT<br>CACAGAAGAATGGGAATTAGCCATGGTCC-3'  | Reverse primer for FRT-KanR-FRT cassette amplification for <i>metA</i> knockout                                                      |
| glns-For     | 5'-CGCCC <u>CTAGGC</u> ATCAATCATCCCCATAAT-3'                                      | Forward primer for <i>glnS'-metY</i> cloning into pSEVA26'1, It carries <i>AvrII</i> restriction site (underlined).                  |
| metY-Rev     | 5'-AAA <u>ACCCGGG</u> CTAGATTGCAGCAAAGCCGCC-3'                                    | Reverse primer for <i>glnS'-metY</i> cloning into pSEVA26'1, It carries <i>SmaI</i> restriction site.                                |
| metX-For     | 5'-AAA <u>ACCCGGG</u> TTTAACTTTAGAAAGGAGGACAGCTATGCCCA<br>CCCTCGCGCCTTCAGGTCAA-3' | Forward primer for <i>metX</i> cloning into pSEVA26'1, It carries <i>SmaI</i> restriction site.                                      |
| metX-Rev     | 5'-CCGCTCTAGATTAGATGTAGAACTCGATGTAGGTCTGAAGGG<br>TTGTCTTCGTC-3'                   | Reverse primer for <i>metX</i> cloning into pSEVA26'1, It carries <i>SmaI</i> restriction site.                                      |
| metY-his-For | 5'-CGCCGCTAGCCCAAAGTACGACAATTCCA-3'                                               | Forward primer for <i>metY</i> cloning into pBU26' <i>glnS</i> , It carries <i>NheI</i> restriction site.                            |
| metY-his-Rev | 5'-AAAAGGCGCCCTAGTGATGGTGATGGTGATGGATTGCAGCA<br>AAGCCGCC-3'                       | Reverse primer for <i>metY</i> cloning into pBU26' <i>glnS</i> , It carries <i>KasI</i> restriction site.                            |
| metX-his-For | 5'-AAA <u>ACCCGGG</u> GATGCCACCCTCGCGCCTTCAGGTCAA-3'                              | Forward primer for <i>metX</i> cloning into pQE80L, It carries <i>SmaI</i> restriction site.                                         |
| metX-his-Rev | 5'-CCGCTGCAGCTTAGATGTAGAACTCGATGTAGGTCTGAAGG<br>GTTGTCTTCGTC-3'                   | Reverse primer for <i>metX</i> cloning into pQE80L, It carries <i>PstI</i> restriction site.                                         |
| B*-For       | 5'-AAAAGAATTCGAGCTCTAGAGTCCGGTC-3'                                                | Forward primer for inserting cDNA encoding barstar (2 Met version) into pQE80L. It carries <i>EcoRI</i> restriction site.            |
| B*-Rev       | 5'- <u>AAGCTT</u> GCGGGTTTGTGTTTCCATA-3'                                          | Reverse primer for inserting cDNA encoding barstar (2 Met version) into pQE80L. It carries <i>HindIII</i> restriction site.          |
| GTL-For      | 5'-CCGCGGATCCAGAGAAAACCTGTATTTC-3'                                                | Forward primer for inserting cDNA encoding GTL into pQE80L. It carries <i>BamHI</i> restriction site.                                |
| GTL-Rev      | 5'-AAA <u>ACTGCAG</u> TTATTAAGGCCGCAAACCT-3'                                      | Reverse primer for inserting cDNA encoding GTL into pQE80L. It carries <i>PstI</i> restriction site.                                 |
| ECFP-N-For   | 5'-AAAAGGATCCATGGTGAGCAAGG-3'                                                     | Forward primer for inserting cDNA encoding ECFP-N into pQE80L. It carries <i>BamHI</i> restriction site.                             |
| ECFP-N-Rev   | 5'- <u>AAGCTT</u> TTATCACTTGTACAGCTCG-3'                                          | Reverse primer for inserting cDNA encoding GTL into pQE80L. It carries <i>HindIII</i> restriction site.                              |
| ECFP-C-For   | 5'-CCGCGAATTCATTAAGAGGAGAAATTA <u>ACTATGGTGAGC</u> -<br>3'                        | Forward primer for inserting cDNA encoding ECFP-C into pQE80L. It carries <i>EcoRI</i> restriction site.                             |
| ECFP-C-Rev   | 5'- <u>AAGCTT</u> AGTGATGGTGATGGTGATGC-3'                                         | Reverse primer for inserting cDNA encoding ECFP-C into pQE80L. It carries <i>HindIII</i> restriction site.                           |
| GFP-For      | 5'-AAAAGGATCCGAGGCCTGTACTTCCAATCCGCGA-3'                                          | Forward primer for inserting cDNA encoding for GFP (both 1M and 2M version) into pQE80L. It carries <i>BamHI</i> restriction site.   |
| GFP-Rev      | 5'-CGCCAAGCTTTCATTTATACAGTTCATCTTTGCCG-3'                                         | Reverse primer for inserting cDNA encoding for GFP (both 1M and 2M version) into pQE80L. It carries <i>HindIII</i> restriction site. |

**Table S3. Plasmidic constructs used in this study.**

| <b>Construct</b>               | <b>Origin of replication</b> | <b>Resistance</b> | <b>Description</b>                                                                                                                                                                            |
|--------------------------------|------------------------------|-------------------|-----------------------------------------------------------------------------------------------------------------------------------------------------------------------------------------------|
| pSEVA26' <i>glnS-metY-metX</i> | P15A                         | Kan               | Construct constitutively expressing <i>cgHSAT</i> and <i>cgOAHSS</i> for in-cell production of Aha in <i>MDS15</i> and <i>MDS15A E. coli</i> strains.                                         |
| pQE80L- <i>metX</i>            | ColE1                        | Amp               | Construct expressing <i>cgHSAT</i> with N-terminal HisTag for <i>in vitro</i> test.                                                                                                           |
| pBU26' <i>glnS-metY-his</i>    | P15A                         | Kan               | Construct constitutively expressing <i>cgOAHSS</i> with C-terminal His Tag for <i>in vitro</i> test.                                                                                          |
| pQE80L-B*                      | ColE1                        | Amp               | Construct expressing B* under IPTG induction                                                                                                                                                  |
| pQE80L-ECFP-N                  | ColE1                        | Amp               | Construct expressing enhanced cyan fluorescent protein with N-terminal His <sub>6</sub> -tag, under IPTG induction                                                                            |
| pQE80L-ECFP-C                  | ColE1                        | Amp               | Construct expressing enhanced cyan fluorescent protein with C-terminal His <sub>6</sub> -tag, under IPTG induction                                                                            |
| pQE80L-GTL                     | ColE1                        | Amp               | Construct expressing <i>Geobacillus thermocatenulatus</i> lipase, under IPTG induction                                                                                                        |
| pQE80L-GFP-1M                  | ColE1                        | Amp               | Construct expressing green fluorescent protein from <i>Aequorea victoria</i> (carrying one methionine residue), under IPTG induction.                                                         |
| pQE80L-GFP-2M                  | ColE1                        | Amp               | Construct expressing green fluorescent protein from <i>Aequorea victoria</i> (carrying two methionine residue), under IPTG induction.                                                         |
| pKD46                          | oriR101; w/repA101ts         | Amp               | For making chromosomal deletions of genes with FRT sites. Temperature sensitive replication; encodes lambda Red genes ( <i>exo</i> , <i>bet</i> , <i>gam</i> ); arabinose-inducible promoter. |
| pKD4                           | oriR6Kgamma                  | Kan               | Template plasmid for FRT-flanked kanamycin cassette                                                                                                                                           |
| pCP20                          | oriR101                      | Amp               | Temperature-sensitive origin of replication; encodes the FLP recombinase. Used to eliminate kanamycin resistance cassette from <i>E. coli</i> strains.                                        |

**Table S4. Compounds tested *in vitro* as nucleophiles for *cgOAHSS* reaction.** The plus (+) sign in the **Reactivity** column denotes that the compound was successfully condensed with L-homoserine in the presence of the enzyme. Product formation was detected by TLC chromatography and ninhydrin stain (data not shown). The minus (-) sign denotes that no reaction occurred under our experimental conditions.

| Name                   | Structure                                                                           | Reactivity | Name                 | Structure                                                                             | Reactivity |
|------------------------|-------------------------------------------------------------------------------------|------------|----------------------|---------------------------------------------------------------------------------------|------------|
| Pyrrrole               | 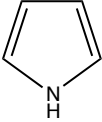   | -          | 1,2,3,4-Tetrazole    |    | -          |
| Indole-3-acetic acid   |    | -          | 6-Benzylaminopurine  |    | -          |
| 2-Aminoisobutyric acid |    | -          | Sodium sulphide      | $S_2^-$                                                                               | +          |
| 1,2 Pyrazole           |   | +          | Sodium thiosulfate   |   | +          |
| Imidazole              |  | -          | 2-Mercaptoethanol    |  | +          |
| Pyridazine             |  | -          | 2-Mercaptoethylamine |  | +          |

|                               |                                                                                     |   |                                        |                                                                                       |   |
|-------------------------------|-------------------------------------------------------------------------------------|---|----------------------------------------|---------------------------------------------------------------------------------------|---|
| Phenylhydrazine               | 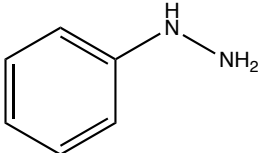    | - | L-Cysteine                             |     | - |
| Sodium azide                  | ${}^{-}\text{N}=\text{N}=\text{N}^{\ominus}$                                        | + | Hypotaurine                            |    | - |
| 1,2,3-Benzotriazole           |    | + | Benzenethiol<br>(Thiophenol)           |    | + |
| 1,3-Benzodioxole              |    | + | Benzeneselenol<br>(Phenylselenol)      |    | + |
| 5-Carboxy-1,2,3-Benzotriazole |    | - | Benzyl mercaptan                       |    | + |
| 1,2,4-Triazole                |  | - | 2-Propene-1-thiol<br>(Allyl mercaptan) |  | + |
